# Supplementary material for: Genomic Characterisation of Mushroom Pathogenic Pseudomonads and Their Interaction with Bacteriophages
Source: PubMed Central journal article supplement (PMC7696170; doi:10.3390/v12111286), 2020-11-10
Supplement: viruses-12-01286-s001.pdf [file viruses-12-01286-s001.pdf]

## Supplementary Material Results and Tables

### Results

#### *Type III, Type IV and Type VI secretion systems*

##### *P. tolaasii* NCPPB 2192T

BLASTp analysis of the different secretion systems indicated *P. fluorescens* as the closest hits. Screening of the genome sequence with KofamKOALA and Artemis identified one putative T3SS cluster of 23 genes, from RS00335 to RS00445, and three non-contiguous parts of a T3SS: RS04585 (*hrcC*) as part of a potential operon to RS04600; RS05825 to RS05850 (including a *hrcV* gene); RS12630 to RS12695 (with genes including *hrcC* and *hrcT* homologs).

The complete cluster was located between a putative tRNA-Gln (predicted by tRNA-Scan-SE) at RS00310 and a putative tRNA-Met (RS00450) with genes for hypothetical protein (HP)-isomerase-*ggf* gene downstream. The genes appeared to be organised into three or four operons and drops in the %GC ratio were observed upstream of RS00335 and RS00440. A putative sigma-54-dependent enhancer binding protein transcriptional regulator (RS00335) with a 75% match (amino acids) to RspR was on the left flank of the cluster and a putative extracytoplasmic function alternative sigma factor RspL (related to HrpL from *P. syringae*) gene (RS00445) with 91% match was found on the right flank. A potential RspL (HrpL) promoter (consensus sequence: GGAACC-15/16N-CCAC) was identified upstream of RS00440 (HP) linked to *hrcV*. Together, these features suggest the cluster is most similar to the gene cluster type found in *P. fluorescens* [1, 2].

The three fragmented genomic regions lacked obvious RspL or RspR genes or RspL (HrpL) promoters, though two potential degenerate promoters were found upstream of two gene clusters, at RS05825 and RS12655. The putative HrcC encoding gene (RS04585) was contiguous with three downstream genes, a HP, a putative Invasion protein (*IagB*) and quinone-dependent dihydroorotate dehydrogenase. Together, these observations may, therefore, indicate that either the second T3SS cluster is in degradation or that it is adapting for other purposes. A search for T3SS effectors found, like observed for *P. fluorescens*, little evidence of a large complement of genes with only HopJ (RS05495), HrpK (RS09075) and ExoU (RS13030) matches.

A search for a T4SS found a small gene cluster between RS08725-08745 and several other genes spread throughout the genome: *pilW* (RS10610), pilin (RS27580 and RS27585) and *cpaB* (RS27590). Searches for a T6SS identified two operons, in opposing directions, spanning RS14450-14570 and five potential *hcp1* genes (RS26990, RS16835, RS25755, RS14530 and RS18935). Several VgrG alleles (RS00795, RS04750 and RS15065) were also found. Other potential genes were found between RS05335-5375, RS25095-25170, and RS08870 (*vask*) and RS25775 (Supplementary Material Table 5).

##### *P. agarici* NCPPB 2472

BLASTp analysis of the different secretion systems indicated the most similarity with *P. gingeri* and in some cases *P. fluorescens* or *P. syringae*. Screening of the genome sequence identified three T3SS gene clusters, from RS06355-006465, RS18850-18985, and RS22985-23120. Large drops in the %GC ratio were observed flanking three regions, but no tRNA genes were observed on either side of them. The RS06355-006465 cluster consisted of 22 genes with genes exhibiting similarity to *P. fluorescens* as well as *P. syringae*, but there appeared to be a loss of synteny with these gene clusters in some sections. The RS18850-18985 cluster consisted of 28 genes with similarity to *P. gingeri* genes. Notably this gene cluster encodes a putative harpin gene, *hrpZ1* as well as a putative *hrpL* (RS18855). The third gene cluster (RS22985-23120) consisted of 27 genes and showed high similarity to a gene cluster in *P. gingeri* annotated as an Inv-Spa cluster of genes. Notably, putative invasion proteins were also observed in this cluster (RS23015-23020 and RS23115-23120), with RS23045 encoding a putative *IagB* similar to that seen in *P. tolaasii*. These genes are also linked to a putative quinone-dependent dihydroorotate

dehydrogenase gene (RS23005) on one flank thus showing a similar feature as the quinone-IagB linkage in *P. tolaasii*. A gene for a putative SipB effector was also found to be part of this gene cluster. Only three other potential effector genes were identified in the genome: HopJ (RS03325), HrpK (RS18850) and HopAC1 (RS07770), with similarity to *P. gingeri* (all >90% identity). Neither cluster 1 or 3 had obvious T3SS transcriptional regulators associated with them nor were potential HrpL promoter sequences identified in the genome except for *hrpK* and *hopAC1*.

A search for a T4SS found a small gene cluster between RS22660-22685 (including *pilW*, *pilX* and pilus assembly protein genes) and several other genes spread throughout the genome: *pilG* (RS01585), *pilT* (RS01635, RS06650), *pilB* (RS16265) and *pilW* (RS17195).

Searches for a T6SS identified three large gene clusters: RS02645-02770 was arranged in two operons, in opposing directions, with the RS02710-02770 cluster being flanked by large %GC drops; RS21080-21155 was arranged in two operons, in opposing directions, with an Rhs gene on one side (RS21150); RS21510-21580 was arranged as one operon and next to an 8kb region (RS21475-21505) containing a transposase, resolvase and integrase. The entire region is flanked by low %GC ratio drops. A smaller cluster was found at RS12550-12585 and flanked by low %GC ratio regions. A potential type VI-secreted lysozyme-like gene (RS09100) was found. Five genes annotated as Hcp1 Type VI effectors (RS01160, RS02725, RS09880, RS19150, RS19520) were identified as well as four Rhs genes (RS01355, RS05175, RS13620, RS20175) and several pseudogenes (Supplementary Material Table 5).

#### *Pseudomonas* sp. NS1

BLASTp analysis of the different secretion systems indicated *P. fluorescens* as the closest hits. Screening of the genome sequence identified two T3SS gene clusters, from RS10335-10445 (23 genes) and RS25340-25440 (21 genes). Large drops in the %GC ratio were observed flanking both regions. A putative tRNA-Met (RS10330) was observed on the left flank of the first gene cluster. Notably, two genes (RS10325-10320) were observed on the other side of the tRNA-Met, a putative phenazine biosynthesis protein, PhzF, and *ggt*. Together there is some syntenic similarity to *P. tolaasii*. The T3SS genes appeared to be organised into two to four operons with gene matches most closely matching *P. fluorescens* F113. A putative RspL (HrpL) gene (RS10335) with 97% match was found on the left flank of the cluster next to the tRNA-Met and a putative sigma-54 transcriptional regulator (RS10445) with a 77% match (amino acids) to RspR was on the right flank. A potential RspL (HrpL) promoter was found upstream of RS10340 (*hrpJ*) and RS10440.

The RS25340-25440 cluster consisted of 21 genes with genes with two potential operons one strand separated by a tetratricopeptide repeat protein gene (RS25410) on the opposing strand. No obvious transcriptional regulators or RspL promoters were observed. On the right flank, after the low %GC region, were three genes encoding putative *luxR* regulator, superoxide dismutase and peroxidase, showing a synteny similar to *P. tolaasii*.

Also similar to *P. tolaasii* was the discovery of an orphan *hrcC* gene (RS29245) contiguous with downstream genes (four instead of three), a HP, transcriptional regulator, *iagB* and quinone-dependent dihydroorotate dehydrogenase genes.

Only two potential T3SS were found, HopJ (RS00750) and ExoU (RS04255), both of which had similarity to *P. fluorescens* and *P. costantinii* (>90%).

A search for a T4SS found a small gene cluster between RS08735-08750 (including *pilQ*) and another between RS10685-10700 (including *pilV*, *pilW* and *pilX*) with two other orphan genes spread *pilW* (RS00345) and *pilT* (RS04490).

Searches for a T6SS identified three large gene clusters: RS05740-05865 was arranged in two operons, in opposing directions with a low %GC region between them; RS18005-18080 was arranged as one operon flanked by low %GC ratio regions; RS24120-24190 was arranged as one operon, except RS24190 in the opposing direction, flanked by low %GC ratio regions. Two single Hcp1 Type VI effector (RS18030 and RS24190) and VgrG (RS08970 and RS17060) were identified with high similarity to *P. fluorescens* (>90%).

In summary, all three genomes contained all or part of the three secretion systems. When considering the T3SS, the *P. tolaasii* 2192T NCPPB T3SS had similarity with T3SS of *P. agarici* NCPPB 2472 (RS18850-18985) and *P. sp.* NS1 (RS10335-10450). The T3SS of *Pseudomonas sp.* NS1 (RS06355-06465 and RS10335-10450) had similarity to T3SS of *P. agarici* NCPPB 2472 (RS25340-25440 and RS18850-18985, respectively) (Supplementary Material Table 5).

**Table S1.** Primers used in NV1 and  $\phi$ NV3 lysis protein constructs in this study.

| Primer     | Sequence                   |
|------------|----------------------------|
| NV1HolinF  | ATGGTATTCTTTGCTGCGTAC      |
| NV1HolinR  | TCATTTGGTTGCTCTCCATTC      |
| NV1LysoF   | ATGTCGCGGATCTCACTAC        |
| NV1LysoR   | TTATCCTTTATAAAGGTCGTACAGTG |
| Nv3aPin-F  | ATGCAACTAGACACCACGAGCG     |
| Nv3aPin-R  | ATGTCGCGGATCTCACTACTGAGG   |
| Nv3aRzl-F  | ATGCGCTACGCCATCATTGCTG     |
| 3aLys_ex_R | ATCCAGCAATAGTGGCGAGTACG    |
| 3aPin_ex_R | TTCTTAGGTTTCATCCGCAGCC     |
| 3aRzl_ex_R | ATCCTCCAGTGGGTATCCATTAAGGG |

**Table S2.** Table of all lysis protein constructs used in this study.

| Construct       | Protein                                                       |
|-----------------|---------------------------------------------------------------|
| pEXP5-NV1Hol    | Phage NV1 Holin                                               |
| pEXP5-NV1Lys    | Phage NV1 Lysozyme                                            |
| pEXP5-NV3Pin    | Phage $\phi$ NV3 Pinholin                                     |
| pEXP5-NV3Lys    | Phage $\phi$ NV3 Endolysin                                    |
| pEXP5-NV3Rzl    | Phage $\phi$ NV3 Rzl/Rzl-like protein                         |
| PEXP5-NV3PinLys | Phage $\phi$ NV3 Pinholin and Endolysin                       |
| pEXP5-NV3Full   | Phage $\phi$ NV3 Pinholin, Endolysin and Rzl/Rzl-like protein |

**Table S3.** Plasmids used in this study.

| Plasmid                      | Features                                                                                                                                                                                                                                                                                     | Source                                  |
|------------------------------|----------------------------------------------------------------------------------------------------------------------------------------------------------------------------------------------------------------------------------------------------------------------------------------------|-----------------------------------------|
| pEXP5-CT/TOPO®               | T7 promoter, T7 forward binding site, Ribosome binding site, TOPO® Cloning site, C-terminal polyhistidine (6xHis) tag, T7 transcription terminator, T7 reverse priming site, <i>bla</i> promoter, Ampicillin resistance gene ( $\beta$ -lactamase), pUC origin of replication ( <i>ori</i> ) | Invitrogen, ThermoFisher Scientific, UK |
| pCRT <sup>TM</sup> 2.1-TOPO® | LacZ $\alpha$ fragment, M13 reverse priming site, Multiple cloning site, T7 promoter/priming site, M13 Forward (-20) priming site, f1 origin, Kanamycin resistance ORF, Ampicillin resistance ORF, pUC origin                                                                                | Invitrogen, ThermoFisher Scientific, UK |
| pBBR1MCS-2                   | pBBR1 oriV, pBBR1 Rep, LacZ $\alpha$ promoter, NeoR/KanR, M13 Forward priming site, M13 Reverse priming site, Multiple cloning site.                                                                                                                                                         |                                         |

**Table S4.** Predicted secondary metabolites and non-ribosomal peptide synthetase in *Pseudomonas tolaasii* 2192T, *P. agarici* NCPPB 2472 and *Pseudomonas* sp. NS1 genome.

| <i>P. tolaasii</i> NCPPB 2192T |                                                  |
|--------------------------------|--------------------------------------------------|
| <b>Locus tag</b>               | <b>Predicted functions</b>                       |
| RS30620                        | non-ribosomal peptide synthetase                 |
| RS22935                        | non-ribosomal peptide synthetase                 |
| RS23980                        | non-ribosomal peptide synthetase                 |
| RS02650                        | non-ribosomal peptide synthetase                 |
| RS24725                        | non-ribosomal peptide synthetase                 |
| RS16160                        | non-ribosomal peptide synthetase                 |
| RS16165                        | pyoverdine synthesis                             |
| RS16170                        | pyoverdine synthesis                             |
| RS16175                        | TonB-dependent siderophore receptor              |
| RS12420                        | siderophore synthetase                           |
| RS12390                        | siderophore synthetase                           |
| RS12395                        | MFS transporter                                  |
| RS12400                        | TonB-dependent receptor                          |
| RS12430                        | TonB-dependent siderophore receptor              |
| <i>P. agarici</i> NCPPB 2472   |                                                  |
| RS12910                        | non-ribosomal peptide synthetase                 |
| RS12915                        | non-ribosomal peptide synthetase                 |
| RS12920                        | non-ribosomal peptide synthetase                 |
| RS12925                        | non-ribosomal peptide synthetase                 |
| RS00065                        | non-ribosomal peptide synthetase                 |
| RS20800                        | non-ribosomal peptide synthetase                 |
| RS20810                        | non-ribosomal peptide synthetase                 |
| RS10630                        | non-ribosomal peptide synthetase                 |
| RS04660                        | RNA polymerase sigma factor                      |
| RS04665                        | sugar ABC transporter substrate-binding protein  |
| RS04670                        | TonB-dependent siderophore receptor              |
| RS04675                        | aspartate aminotransferase family protein        |
| RS04680                        | AcsD protein                                     |
| RS04685                        | diaminopimelate decarboxylase                    |
| RS04690                        | MFS transporter                                  |
| RS04695                        | AcsC protein                                     |
| RS04700                        | siderophore biosynthesis protein SbnG            |
| RS04705                        | AcsA protein                                     |
| <i>Pseudomonas</i> sp. NS1     |                                                  |
| RS19185                        | MATE family efflux transporter                   |
| RS19190                        | TetR/AcrR family transcriptional regulator       |
| RS19195                        | MFS transporter                                  |
| RS19200                        | toxin-antitoxin system HicB family antitoxin     |
| RS19205                        | type II toxin-antitoxin system HicA family toxin |

|         |                                           |
|---------|-------------------------------------------|
| RS19210 | non-ribosomal peptide synthetase          |
| RS19215 | peptide synthase                          |
| RS19220 | non-ribosomal peptide synthetase          |
| RS19225 | non-ribosomal peptide synthetase          |
| RS19230 | non-ribosomal peptide synthetase          |
| RS19235 | TonB-dependent siderophore receptor       |
| RS19240 | cyclic peptide transporter                |
| RS19245 | N(5)-hydroxyornithine transformylase PvdF |
| RS19250 | chromophore maturation protein PvdO       |
| RS19255 | aminotransferase                          |
| RS19260 | peptidase M19                             |
| RS19265 | PvdJ/PvdD/PvdP-like protein               |
| RS19270 | non-ribosomal peptide synthetase          |
| RS19275 | non-ribosomal peptide synthetase          |
| RS19280 | macrolide transporter subunit MacA        |
| RS19285 | MacB family efflux pump subunit           |
| RS19290 | LuxR family transcriptional regulator     |
| RS19295 | methionine gamma-lyase                    |
| RS19300 | Lrp/AsnC family transcriptional regulator |
| RS26350 | non-ribosomal peptide synthetase          |

**Table S5.** Predicted Type III (T3SS), IV (T4SS) and VI (T6SS) secretion systems in *Pseudomonas tolaasii* 2192T, *P. agarici* NCPPB 2472 and *Pseudomonas* sp. NS1 genome.

| <i>P. tolaasii</i><br>NCPPB 2192T |                                                                                 |
|-----------------------------------|---------------------------------------------------------------------------------|
| T3SS                              |                                                                                 |
| Locus tag                         | Predicted functions                                                             |
| RS00310                           | tRNA-Gln                                                                        |
| RS00335                           | sigma-54-dependent Fis family transcriptional                                   |
| RS00340                           | hypothetical protein                                                            |
| RS00345                           | type III secretion system rspB                                                  |
| RS00350                           | EscJ/YscJ/HrcJ family type III secretion inner                                  |
| RS00355                           | hypothetical protein                                                            |
| RS00360                           | type III secretion protein                                                      |
| RS00365                           | hypothetical protein                                                            |
| RS00370                           | hypothetical protein                                                            |
| RS00375                           | EscC/YscC/HrcC family type III secretion system                                 |
| RS00380                           | type III secretion protein                                                      |
| RS00385                           | transcriptional regulator                                                       |
| RS00390                           | EscU/YscU/HrcU family type III secretion system export apparatus switch protein |
| RS00395                           | EscT/YscT/HrcT family type III secretion system export apparatus protein        |
| RS00400                           | EscS/YscS/HrcS family type III secretion system export apparatus protein        |
| RS00405                           | EscR/YscR/HrcR family type III secretion system export apparatus protein        |
| RS00410                           | type III secretion protein                                                      |
| RS00415                           | flagellar hook-length control protein FliK                                      |
| RS00420                           | type III secretion protein                                                      |
| RS00425                           | flagellum-specific ATP synthase FliI                                            |
| RS00430                           | type III secretion protein                                                      |
| RS00435                           | EscV/YscV/HrcV family type III secretion system                                 |
| RS00440                           | SepL/TyeA/HrpJ family type III secretion system gatekeeper                      |
| RS00445                           | RNA polymerase subunit sigma                                                    |

|           |                                                                             |
|-----------|-----------------------------------------------------------------------------|
| RS00450   | tRNA-Met                                                                    |
| RS04585   | EscC/YscC/HrcC family type III secretion system outer membrane ring protein |
| RS05820   | hypothetical protein                                                        |
| RS05825   | hypothetical protein                                                        |
| RS05830   | hypothetical protein                                                        |
| RS05835   | type III secretion protein                                                  |
| RS05840   | EscV/YscV/HrcV family type III secretion system export apparatus protein    |
| RS05845   | type II and III secretion system protein RhcC2                              |
| RS05850   | hypothetical protein                                                        |
| RS12630   | translocation protein in type III secretion system, RhcU                    |
| RS12635   | EscT/YscT/HrcT family type III secretion system export apparatus protein    |
| RS12640   | succinate dehydrogenase assembly factor 2 family protein                    |
| RS12645   | hypothetical protein                                                        |
| RS12650   | L-aspartate oxidase                                                         |
| RS12655   | RNA polymerase sigma factor RpoE                                            |
| RS12660   | RNA polymerase subunit sigma                                                |
| RS12665   | RNA polymerase subunit sigma                                                |
| RS12670   | serine peptidase                                                            |
| RS12675   | peptidase M48                                                               |
| RS12680   | response regulator SirA                                                     |
| RS12685   | EscC/YscC/HrcC family type III secretion system outer membrane ring protein |
| RS12690   | peroxiredoxin                                                               |
| RSRS05495 | type III effector                                                           |
| RSRS09075 | type III effector HrpK                                                      |
| RSRS13030 | type III secretion system effector protein ExoU                             |

**T4SS**

|         |                                                              |
|---------|--------------------------------------------------------------|
| RS08725 | pilus assembly protein                                       |
| RS08730 | pilus assembly protein PilX                                  |
| RS08735 | pilus assembly protein PilW                                  |
| RS08740 | type IV pilus modification protein PilV                      |
| RS08745 | prepilin-type cleavage/methylation domain-containing protein |
| RS10610 | type IV pilus biogenesis/stability protein PilW              |
| RS27580 | pilus assembly protein                                       |
| RS27585 | pilus assembly protein                                       |
| RS27590 | Flp pilus assembly protein CpaB                              |

**T6SS**

|         |                                                 |
|---------|-------------------------------------------------|
| RS14450 | helicase                                        |
| RS14455 | type VI secretion-associated lipoprotein TagQ   |
| RS14460 | type VI secretion protein                       |
| RS14465 | ABC transporter permease                        |
| RS14470 | ABC transporter ATP-binding protein             |
| RS26990 | Hcp1 family type VI secretion system effector   |
| RS16835 | Hcp1 family type VI secretion system effector   |
| RS25755 | Hcp1 family type VI secretion system effector   |
| RS14530 | Hcp1 family type VI secretion system effector   |
| RS18935 | Hcp1 family type VI secretion system effector   |
| RS05335 | type VI secretion-associated protein            |
| RS05340 | type VI secretion system-associated protein     |
| RS05345 | type VI secretion system-associated protein     |
| RS05350 | type VI secretion protein                       |
| RS05355 | hypothetical protein                            |
| RS05360 | type VI secretion protein                       |
| RS05365 | type VI secretion protein                       |
| RS05370 | type VI secretion system-associated lipoprotein |
| RS05375 | type VI secretion protein                       |
| RS25095 | type VI secretion-associated protein            |
| RS25100 | type VI secretion protein                       |
| RS25105 | hypothetical protein                            |

|         |                                             |
|---------|---------------------------------------------|
| RS25110 | type VI secretion protein                   |
| RS25115 | FHA domain-containing protein               |
| RS25120 | type VI secretion protein ImpA              |
| RS25125 | ClpV1 family T6SS ATPase                    |
| RS25130 | type VI secretion protein                   |
| RS25135 | type VI secretion system protein ImpG       |
| RS25140 | type VI secretion system lysozyme           |
| RS25145 | hypothetical protein                        |
| RS25150 | EvpB family type VI secretion protein       |
| RS25155 | type VI secretion system-associated protein |
| RS25160 | product=type VI secretion protein ImpA      |
| RS25165 | catalase                                    |
| RS25170 | anti-sigma factor                           |
| RS08870 | type VI secretion protein VasK              |
| RS25775 | 4-hydroxy-tetrahydrodipicolinate synthase   |
| RS00795 | type VI secretion protein VgrG              |
| RS04750 | type VI secretion protein VgrG              |
| RS15065 | type VI secretion protein VgrG              |

---

***P. agarici* NCPPB**

2472

---

**T3SS**

|         |                                                                             |
|---------|-----------------------------------------------------------------------------|
| RS06355 | hypothetical protein                                                        |
| RS06360 | product=transcriptional regulator                                           |
| RS06365 | translocation protein in type III secretion system, RhcU                    |
| RS06370 | type III secretion protein                                                  |
| RS06375 | type III secretion protein                                                  |
| RS06380 | type III secretion system protein SsaR                                      |
| RS06385 | hypothetical protein                                                        |
| RS06390 | hypothetical protein                                                        |
| RS06395 | type III secretion apparatus H <sup>+</sup> -transporting two-sector ATPase |
| RS06400 | type III secretion protein                                                  |
| RS06405 | hypothetical protein                                                        |
| RS06410 | type III secretion protein                                                  |
| RS06415 | hypothetical protein                                                        |
| RS06420 | hypothetical protein                                                        |
| RS06425 | type III secretion protein                                                  |
| RS06430 | hypothetical protein                                                        |
| RS06435 | hypothetical protein                                                        |
| RS06440 | type II and III secretion system protein RhcC2                              |
| RS06445 | type III secretion protein                                                  |
| RS06450 | type III secretion protein                                                  |
| RS06455 | hypothetical protein                                                        |
| RS06460 | product=hypothetical protein                                                |
| RS06465 | hypothetical protein                                                        |
| RS22985 | hypothetical protein                                                        |
| RS22990 | product=D-alanyl-D-alanine carboxypeptidase                                 |
| RS22995 | nucleotide cyclase                                                          |
| RS23000 | 50S rRNA methyltransferase                                                  |
| RS23005 | product=dihydroorotate dehydrogenase                                        |
| RS23010 | hypothetical protein                                                        |
| RS23015 | invasion protein OrgB                                                       |
| RS23020 | protein OrgA                                                                |
| RS23025 | product=pathogenicity island 1 effector protein                             |
| RS23030 | type III secretion system protein PrgJ                                      |
| RS23035 | product=protein MxiH                                                        |
| RS23040 | type III secretion system protein PrgH                                      |
| RS23045 | invasion protein IagB                                                       |
| RS23050 | invasion protein regulator                                                  |

|             |                                                                                                                  |
|-------------|------------------------------------------------------------------------------------------------------------------|
| RS23055     | acyl carrier protein                                                                                             |
| RS23060     | hypothetical protein                                                                                             |
| RS23065     | hypothetical protein                                                                                             |
| RS23070     | pathogenicity island 1 effector protein SipB                                                                     |
| RS23075     | product=chaperone protein SicA                                                                                   |
| RS23080     | type III secretion system protein SpaS                                                                           |
| RS23085     | product=type III secretion system protein SpaR                                                                   |
| RS23090     | type III secretion system protein SpaQ                                                                           |
| RS23095     | product=type III secretion system protein                                                                        |
| RS23100     | protein SpaO                                                                                                     |
| RS23105     | hypothetical protein                                                                                             |
| RS23110     | protein SpaM                                                                                                     |
| RS23115     | ATP synthase                                                                                                     |
| RS23120     | Invasion protein B family                                                                                        |
| RS18850     | type III effector HrpK                                                                                           |
| RS18855     | RNA polymerase sigma factor RpoE                                                                                 |
| RS18860     | type III secretion protein HrpJ                                                                                  |
| RS18865     | Type III secretion inner membrane channel protein (LcrD,HrcV,EscV,SsaV)                                          |
| RS18870     | type III secretion protein HrpQ                                                                                  |
| RS18875     | Type III secretion cytoplasmic ATP synthase (EC 3.6.3.14, YscN,SpaL,MxiB,HrcN,EscN)                              |
| RS18880     | Type III secretion spans bacterial envelope protein (YscO)                                                       |
| RS18885     | hypothetical protein                                                                                             |
| RS18890     | hypothetical protein                                                                                             |
| RS18895     | type III secretion protein HrcQb                                                                                 |
| RS18900     | Type III secretion inner membrane protein (YscR,SpaR,HrcR,EscR, homologous to flagellar export components)       |
| RS18905     | Type III secretion inner membrane protein (YscS, homologous to flagellar export components)                      |
| RS18910     | Type III secretion inner membrane protein (YscT,HrcT,SpaR,EscT,EpaR1, homologous to flagellar export components) |
| RS18915     | Type III secretion inner membrane protein (YscU,SpaS,EscU,HrcU,SsaU, homologous to flagellar export components)  |
| RS18920     | hypothetical protein                                                                                             |
| RS18925     | hypothetical protein                                                                                             |
| RS18930     | negative regulator of hrp expression HrpV                                                                        |
| RS18935     | hypothetical protein                                                                                             |
| RS18940     | Type III secretion outer membrane pore forming protein (YscC,MxiD,HrcC, InvG)                                    |
| RS18945     | type III secretion protein HrpG                                                                                  |
| RS18950     | type III secretion protein HrpF                                                                                  |
| RS18955     | hypothetical protein                                                                                             |
| RS18960     | type III secretion protein HrpD                                                                                  |
| RS18965     | Type III secretion bridge between inner and outer membrane lipoprotein (YscJ,HrcJ,EscJ, PscJ)                    |
| RS18970     | type III secretion protein HrpB(Pto)                                                                             |
| RS18975     | hypothetical protein                                                                                             |
| RS18980     | Type III helper protein HrpZ1                                                                                    |
| RS18985     | type III helper protein HrpA                                                                                     |
| RS22995     | nucleotide cyclase                                                                                               |
| RS23000     | 50S rRNA methyltransferase                                                                                       |
| RS23025     | pathogenicity island 1 effector protein                                                                          |
| RS23030     | type III secretion system protein PrgJ                                                                           |
| RS22985     | hypothetical protein                                                                                             |
| RS03325     | type III effector                                                                                                |
| RS18830     | type III effector HrpK                                                                                           |
| RS07770     | type III effector HopAC1                                                                                         |
| <hr/>       |                                                                                                                  |
| <b>T4SS</b> |                                                                                                                  |
| RS22640     | signal peptidase II                                                                                              |



|         |                                                    |
|---------|----------------------------------------------------|
| RS22645 | peptidylprolyl isomerase                           |
| RS22650 | 4-hydroxy-3-methylbut-2-enyl diphosphate reductase |
| RS22655 | general secretion pathway protein GspH             |
| RS22660 | general secretion pathway protein GspH             |
| RS22665 | hypothetical protein                               |
| RS22670 | pilus assembly protein PilW                        |
| RS22675 | pilus assembly protein PilX                        |
| RS22680 | pilus assembly protein                             |
| RS22685 | pilus assembly protein                             |
| RS01575 | chemotaxis protein CheW                            |
| RS01585 | pilus assembly protein PilG                        |
| RS01635 | type IV pili twitching motility protein PilT       |
| RS06650 | type IV pili twitching motility protein PilT       |
| RS16265 | type IV-A pilus assembly ATPase PilB               |
| RS17195 | pilus assembly protein PilW                        |

**T6SS**

|         |                                               |
|---------|-----------------------------------------------|
| RS02645 | helicase                                      |
| RS02650 | type VI secretion-associated lipoprotein TagQ |
| RS02655 | type VI secretion protein                     |
| RS02660 | hypothetical protein                          |
| RS02665 | ABC transporter ATP-binding protein           |
| RS02670 | serine/threonine protein kinase               |
| RS02710 | type VI secretion protein ImpA                |
| RS02715 | hypothetical protein                          |
| RS02720 | EvpB family type VI secretion protein         |
| RS02725 | Hcp1 family type VI secretion system effector |
| RS02730 | hypothetical protein                          |
| RS02735 | hypothetical protein                          |
| RS02740 | type VI secretion system lysozyme             |
| RS02745 | type VI secretion system protein ImpG         |
| RS02750 | type VI secretion protein                     |
| RS02755 | ClpV1 family T6SS ATPase                      |
| RS02760 | type VI secretion protein ImpA                |
| RS02765 | hypothetical protein                          |
| RS02770 | hypothetical protein                          |
| RS21475 | hypothetical protein                          |
| RS21480 | hypothetical protein                          |
| RS21485 | hypothetical protein                          |
| RS21490 | resolvase                                     |
| RS21495 | transposase                                   |
| RS21500 | hypothetical protein                          |
| RS21505 | integrase                                     |
| RS21490 | product=resolvase                             |
| RS21495 | transposase                                   |
| RS21500 | product=hypothetical protein                  |
| RS21505 | integrase                                     |
| RS21510 | product=ImpA-like protein                     |
| RS21515 | product=fimbrial protein                      |
| RS21520 | product=hypothetical protein                  |
| RS21525 | type VI secretion system protein ImpM         |
| RS21530 | product=ImcF-like family protein              |
| RS21535 | product=type VI secretion system protein ImpK |
| RS21540 | type VI secretion protein                     |
| RS21545 | hypothetical protein                          |
| RS21550 | ClpV1 family T6SS ATPase                      |
| RS21555 | type VI secretion system protein              |
| RS21560 | product=type VI secretion system protein      |
| RS21060 | hydroxyacid dehydrogenase                     |

|                               |                                                                                                                  |
|-------------------------------|------------------------------------------------------------------------------------------------------------------|
| RS21065                       | glucoamylase                                                                                                     |
| RS21070                       | divalent metal cation transporter                                                                                |
| RS21075                       | peptidyl-Asp metalloendopeptidase                                                                                |
| RS21080                       | type VI secretion protein                                                                                        |
| RS21085                       | type VI secretion system protein ImpL                                                                            |
| RS21090                       | type VI secretion system protein ImpK                                                                            |
| RS21095                       | product=type VI secretion protein                                                                                |
| RS21100                       | product=type VI secretion protein                                                                                |
| RS21105                       | product=type VI secretion protein                                                                                |
| RS21110                       | product=EvpB family type VI secretion protein                                                                    |
| RS21115                       | type VI secretion effector protein (Hcp)                                                                         |
| RS21120                       | type VI secretion protein                                                                                        |
| RS21125                       | product=type VI secretion system protein ImpG                                                                    |
| RS21130                       | type VI secretion protein                                                                                        |
| RS21135                       | ClpV1 family T6SS ATPase                                                                                         |
| RS12550                       | type VI secretion protein                                                                                        |
| RS12555                       | EvpB family type VI secretion protein                                                                            |
| RS12560                       | type VI secretion protein                                                                                        |
| RS12565                       | type IV secretion protein DotU                                                                                   |
| RS12570                       | flagellar motor protein MotB                                                                                     |
| RS12575                       | Hcp family T6SS protein CtsH1                                                                                    |
| RS12580                       | ClpV1 family T6SS ATPase                                                                                         |
| RS12585                       | type IV secretion protein Rhs                                                                                    |
| RS09100                       | type VI secretion system lysozyme-like protein                                                                   |
| RS19520                       | Hcp1 family type VI secretion system effector                                                                    |
| RS19150                       | Hcp1 family type VI secretion system effector                                                                    |
| RS09880                       | Hcp1 family type VI secretion system effector                                                                    |
| RS02725                       | Hcp1 family type VI secretion system effector                                                                    |
| RS01160                       | Hcp1 family type VI secretion system effector                                                                    |
| RS01355                       | type IV secretion protein Rhs                                                                                    |
| RS05175                       | type IV secretion protein Rhs                                                                                    |
| RS13620                       | type IV secretion protein Rhs                                                                                    |
| RS20175                       | type IV secretion protein Rhs                                                                                    |
| <hr/>                         |                                                                                                                  |
| <b><i>Pseudomonas</i> sp.</b> |                                                                                                                  |
| <b>NS1</b>                    |                                                                                                                  |
| <hr/>                         |                                                                                                                  |
| <b>T3SS</b>                   |                                                                                                                  |
| <hr/>                         |                                                                                                                  |
| RS10335                       | RNA polymerase sigma-54 factor RpoN                                                                              |
| RS10340                       | hypothetical protein                                                                                             |
| RS10345                       | Type III secretion inner membrane channel protein (LcrD,HrcV,EscV,SsaV)                                          |
| RS10350                       | hypothetical protein                                                                                             |
| RS10355                       | type III secretion protein HrpQ                                                                                  |
| RS10360                       | Type III secretion cytoplasmic ATP synthase (EC 3.6.3.14, YscN,SpaL,MxiB,HrcN,EscN)                              |
| RS10365                       | hypothetical protein                                                                                             |
| RS10370                       | hypothetical protein                                                                                             |
| RS10375                       | hypothetical protein                                                                                             |
| RS10380                       | Type III secretion inner membrane protein (YscR,SpaR,HrcR,EscR, homologous to flagellar export components)       |
| RS10385                       | Type III secretion inner membrane protein (YscS, homologous to flagellar export components)                      |
| RS10390                       | Type III secretion inner membrane protein (YscT,HrcT,SpaR,EscT,EpaR1, homologous to flagellar export components) |
| RS10395                       | Type III secretion inner membrane protein (YscU,SpaS,EscU,HrcU,SsaU, homologous to flagellar export components)  |
| RS10400                       | negative regulator of hrp expression HrpV                                                                        |
| RS10405                       | type III secretion protein HrpT                                                                                  |
| RS10410                       | Type III secretion outer membrane pore forming protein (YscC,MxiD,HrcC, InvG)                                    |
| RS10415                       | type III secretion protein HrpG                                                                                  |

|         |                                                                                                                 |
|---------|-----------------------------------------------------------------------------------------------------------------|
| RS10420 | hypothetical protein                                                                                            |
| RS10425 | Type III secretion cytoplasmic protein (YscL)                                                                   |
| RS10430 | type III secretion protein HrpD                                                                                 |
| RS10435 | Type III secretion bridge between inner and outer membrane lipoprotein (YscJ,HrcJ,EscJ, PscJ)                   |
| RS10440 | hypothetical protein                                                                                            |
| RS10445 | hypothetical protein                                                                                            |
| RS10450 | Pathogenicity locus probable regulatory protein hrpR                                                            |
| RS25340 | hypothetical protein                                                                                            |
| RS25345 | Type III secretion inner membrane protein (YscU,SpaS,EscU,HrcU,SsaU, homologous to flagellar export components) |
| RS25350 | Type III secretion inner membrane protein (YscT,HrcT,SpaR,EscT,EpaR1,homologous to flagellar export components) |
| RS25355 | Type III secretion inner membrane protein (YscS,homologous to flagellar export components)                      |
| RS25360 | Type III secretion inner membrane protein (YscR,SpaR,HrcR,EscR,homologous to flagellar export components)       |
| RS25365 | hypothetical protein                                                                                            |
| RS25370 | hypothetical protein                                                                                            |
| RS25375 | Type III secretion cytoplasmic ATP synthase (EC 3.6.3.14, YscN,SpaL,MxiB,HrcN,EscN)                             |
| RS25380 | Type III secretion cytoplasmic protein (YscL)                                                                   |
| RS25385 | hypothetical protein                                                                                            |
| RS25390 | Type III secretion bridge between inner and outer membrane lipoprotein (YscJ,HrcJ,EscJ, PscJ)                   |
| RS25395 | hypothetical protein                                                                                            |
| RS25400 | hypothetical protein                                                                                            |
| RS25405 | Type III secretion outer membrane pore forming protein (YscC,MxiD,HrcC, InvG)                                   |
| RS25410 | hypothetical protein                                                                                            |
| RS25415 | hypothetical protein                                                                                            |
| RS25420 | Type III secretion outer membrane contact sensing protein (YopN,Yop4b,LcrE)                                     |
| RS25425 | Type III secretion inner membrane channel protein (LcrD,HrcV,EscV,SsaV)                                         |
| RS25430 | hypothetical protein                                                                                            |
| RS25435 | hypothetical protein                                                                                            |
| RS25440 | hypothetical protein                                                                                            |
| RS29245 | EscC/YscC/HrcC family type III secretion system outer membrane ring protein                                     |
| RS00750 | type III effector                                                                                               |
| RS04255 | type III secretion system effector protein exou                                                                 |

**T4SS**

|         |                                          |
|---------|------------------------------------------|
| RS08735 | Type IV pilus biogenesis protein PilM    |
| RS08745 | Type IV pilus biogenesis protein PilP    |
| RS08750 | Type IV pilus biogenesis protein PilQ    |
| RS10685 | Type IV fimbrial biogenesis protein PilV |
| RS10690 | Type IV fimbrial biogenesis protein PilW |
| RS10695 | Type IV fimbrial biogenesis protein PilX |
| RS10700 | Type IV pilus biogenesis protein PilE    |
| RS00345 | Type IV pilus biogenesis protein PilF    |
| RS04490 | twitching motility protein PilT          |

**T6SS**

|         |                                                                     |
|---------|---------------------------------------------------------------------|
| RS05740 | hypothetical protein                                                |
| RS05745 | Autotransporter adhesin                                             |
| RS05750 | hypothetical protein                                                |
| RS05755 | ABC-type antimicrobial peptide transport system, permease component |
| RS05760 | ABC transporter, ATP-binding protein                                |
| RS05765 | T6SS Serine/threonine protein kinase (EC 2.7.11.1) PpkA             |
| RS05770 | T6SS protein serine/threonine phosphatase PppA                      |
| RS05775 | T6SS associated component TagF (ImpM)                               |
| RS05780 | T6SS component TssM (IcmF/VasK)                                     |

|         |                                                                   |
|---------|-------------------------------------------------------------------|
| RS05785 | T6SS outer membrane component TssL (ImpK/VasF) / OmpA/MotB domain |
| RS05790 | T6SS component TssK (ImpJ/VasE)                                   |
| RS05795 | Type VI secretion lipoprotein/VasD                                |
| RS05800 | T6SS forkhead associated domain protein ImpI/VasC                 |
| RS05805 | T6SS component TssA (ImpA)                                        |
| RS05810 | T6SS component TssB (ImpB/VipA)                                   |
| RS05815 | T6SS component TssC (ImpC/VipB)                                   |
| RS05820 | T6SS component Hcp                                                |
| RS05825 | T6SS lysozyme-like component TssE                                 |
| RS05830 | T6SS component TssF (ImpG/VasA)                                   |
| RS05835 | T6SS component TssG (ImpH/VasB)                                   |
| RS05840 | T6SS AAA+ chaperone ClpV (TssH)                                   |
| RS05845 | ClpV1 family T6SS ATPase                                          |
| RS05850 | FIG00964469: hypothetical protein                                 |
| RS05855 | hypothetical protein                                              |
| RS05860 | hypothetical protein                                              |
| RS05865 | putative transmembrane anti-sigma factor                          |
| RS18010 | Catalase-like heme-binding protein                                |
| RS18020 | T6SS component TssB (ImpB/VipA)                                   |
| RS18025 | T6SS component TssC (ImpC/VipB)                                   |
| RS18030 | T6SS component Hcp                                                |
| RS18035 | T6SS lysozyme-like component TssE                                 |
| RS18040 | T6SS component TssF (ImpG/VasA)                                   |
| RS18045 | T6SS component TssG (ImpH/VasB)                                   |
| RS18050 | T6SS AAA+ chaperone ClpV (TssH)                                   |
| RS18055 | type VI secretion protein ImpA                                    |
| RS18060 | hypothetical protein                                              |
| RS18065 | T6SS component TssK (ImpJ/VasE)                                   |
| RS18070 | T6SS outer membrane component TssL (ImpK/VasF) / OmpA/MotB domain |
| RS18075 | T6SS component TssM (IcmF/VasK)                                   |
| RS18080 | T6SS associated component TagF (ImpM)                             |
| RS24120 | T6SS component TssM (IcmF/VasK)                                   |
| RS24125 | T6SS outer membrane component TssL (ImpK/VasF)                    |
| RS24130 | T6SS component TssK (ImpJ/VasE)                                   |
| RS24135 | T6SS secretion lipoprotein TssJ (VasD)                            |
| RS24140 | type VI secretion protein                                         |
| RS24145 | type VI secretion protein                                         |
| RS24150 | T6SS sigma-54-dependent regulator VasH                            |
| RS24155 | T6SS AAA+ chaperone ClpV (TssH)                                   |
| RS24160 | T6SS component TssG (ImpH/VasB)                                   |
| RS24165 | T6SS component TssF (ImpG/VasA)                                   |
| RS24170 | T6SS lysozyme-like component TssE                                 |
| RS24175 | T6SS component TssC (ImpC/VipB)                                   |
| RS24180 | T6SS component TssB (ImpB/VipA)                                   |
| RS24185 | hypothetical protein                                              |
| RS24190 | T6SS component Hcp                                                |
| RS08970 | type IV secretion protein Rhs                                     |
| RS17060 | type IV secretion protein Rhs                                     |

**Table S6.** Predicted prophage in *Pseudomonas tolaasii* 2192T, *P. agarici* NCPPB 2472 and *Pseudomonas* sp. NS1 genome.

| <i>P. tolaasii</i> NCPPB 2192T |               |                |                      |        |
|--------------------------------|---------------|----------------|----------------------|--------|
| Completeness                   | Region Length | Total Proteins | Region Position (bp) | GC %   |
| intact                         | 33.5Kb        | 51             | 496186-529725        | 57.67% |
| intact                         | 52.1Kb        | 58             | 4609424-4661540      | 57.75% |
| intact                         | 32.1Kb        | 26             | 4901329-4933507      | 60.61% |
| intact                         | 44Kb          | 53             | 5295871-5339955      | 58.18% |

|                                     |        |    |                 |        |
|-------------------------------------|--------|----|-----------------|--------|
| intact                              | 54.6Kb | 76 | 6763248-6817888 | 52.42% |
| incomplete                          | 17.6Kb | 21 | 885369-903001   | 57.49% |
| incomplete                          | 16.8Kb | 17 | 1400028-1416864 | 54.14% |
| incomplete                          | 26.9Kb | 21 | 1749306-1776277 | 57.84% |
| questionable                        | 17.5Kb | 20 | 3517221-3534763 | 60.41% |
| <b><i>P. agarici</i> NCPPB 2472</b> |        |    |                 |        |
| incomplete                          | 22.5Kb | 22 | 2495393-2517980 | 58.84% |
| incomplete                          | 17.1Kb | 13 | 2791355-2808524 | 58.56% |
| <b><i>Pseudomonas</i> sp. NS1</b>   |        |    |                 |        |
| intact                              | 46.2Kb | 48 | 3132347-3178632 | 54.77% |
| incomplete                          | 25.4Kb | 23 | 710706-736117   | 56.28% |
| incomplete                          | 21.6Kb | 29 | 1693449-1715135 | 56.95% |
| incomplete                          | 25.3Kb | 8  | 4965531-4990894 | 59.15% |
| incomplete                          | 8.5Kb  | 8  | 6232104-6240655 | 52.13% |

**Table S7.** Predicted phage tail-like bacteriocin in *Pseudomonas tolaasii* 2192T, *P. agarici* NCPPB 2472 genome.

| <b><i>P. tolaasii</i> NCPPB 2192T</b> |                                   |
|---------------------------------------|-----------------------------------|
| <b>Locus tag</b>                      | <b>Predicted functions</b>        |
| RS06590                               | Pyocin activator protein PrtN     |
| RS16305                               | transcriptional regulator         |
| RS16310                               | pyocin R2, holin                  |
| RS16315                               | hypothetical protein              |
| RS16320                               | phage baseplate protein assembly  |
| RS16325                               | phage baseplate protein           |
| RS16330                               | baseplate J protein               |
| RS16335                               | phage tail protein I              |
| RS16340                               | tail fiber protein                |
| RS16345                               | hypothetical protein              |
| RS16350                               | hypothetical protein              |
| RS16355                               | tail protein                      |
| RS16360                               | phage tail protein                |
| <b><i>P. agarici</i> NCPPB 2472</b>   |                                   |
| RS10915                               | pyocin R2, holin                  |
| RS10920                               | hypothetical protein              |
| RS10925                               | DUF2635 domain-containing protein |
| RS10930                               | phage tail protein                |
| RS10935                               | tail protein                      |
| RS10940                               | hypothetical protein              |
| RS10945                               | phage tail protein                |
| RS10950                               | hydroxyacid dehydrogenase         |
| RS10955                               | baseplate protein                 |
| RS10960                               | hypothetical protein              |
| RS10965                               | hypothetical protein              |
| RS10970                               | baseplate J protein               |
| RS10975                               | phage tail protein                |
| RS10980                               | hypothetical protein              |
| RS10985                               | acyltransferase                   |
| RS10990                               | pyocin R, lytic enzyme            |
| RS10995                               | lysozyme                          |
| RS18570                               | pyocin activator protein PrtN     |

**Table S8.** Predicted phage resistance systems in *Pseudomonas tolaasii* 2192T, *P. agarici* NCPPB 2472 and *Pseudomonas* sp. NS1 genome.

| <b><i>P. tolaasii</i> NCPPB 2192T</b> |                                                                       |
|---------------------------------------|-----------------------------------------------------------------------|
| <b>Locus tag</b>                      | <b>Predicted functions</b>                                            |
| RS17360                               | Restriction endonuclease                                              |
| RS17410                               | Restriction endonuclease subunit R                                    |
| RS26390                               | Restriction endonuclease subunit M                                    |
| RS30090                               | Restriction endonuclease subunit M                                    |
| RS30095                               | Restriction endonuclease subunit M                                    |
| RS11470                               | Short-chain dehydrogenase                                             |
| RS11475                               | Hypothetical protein                                                  |
| RS11480                               | DUF3077 domain-containing protein                                     |
| RS11485                               | Mannose-1-phosphate guanylyltransferase/mannose-6-Phosphate isomerase |
| RS11490                               | Alginate O-acetyltransferase                                          |
| RS11495                               | Alginate O-acetyltransferase                                          |
| RS11500                               | MBOAT family protein                                                  |
| RS11505                               | Mannuronate-specific alginate lyase                                   |
| RS11510                               | Alginate O-acetyltransferase                                          |
| RS11515                               | Right-handed parallel beta-helix repeat-containing protein            |
| RS11520                               | Alginate biosynthesis protein AlgE                                    |
